# Supplementary material for: Differences According to Age in the Diagnostic Performance of Cardiac Biomarkers to Predict Frailty in Patients with Acute Heart Failure
Source: MDPI journal article supplement (doi:10.3390/biom12020245), 2022-02-02
Supplement: s1 [file s1]

Supplementary material

Figure S1. SPPB scale

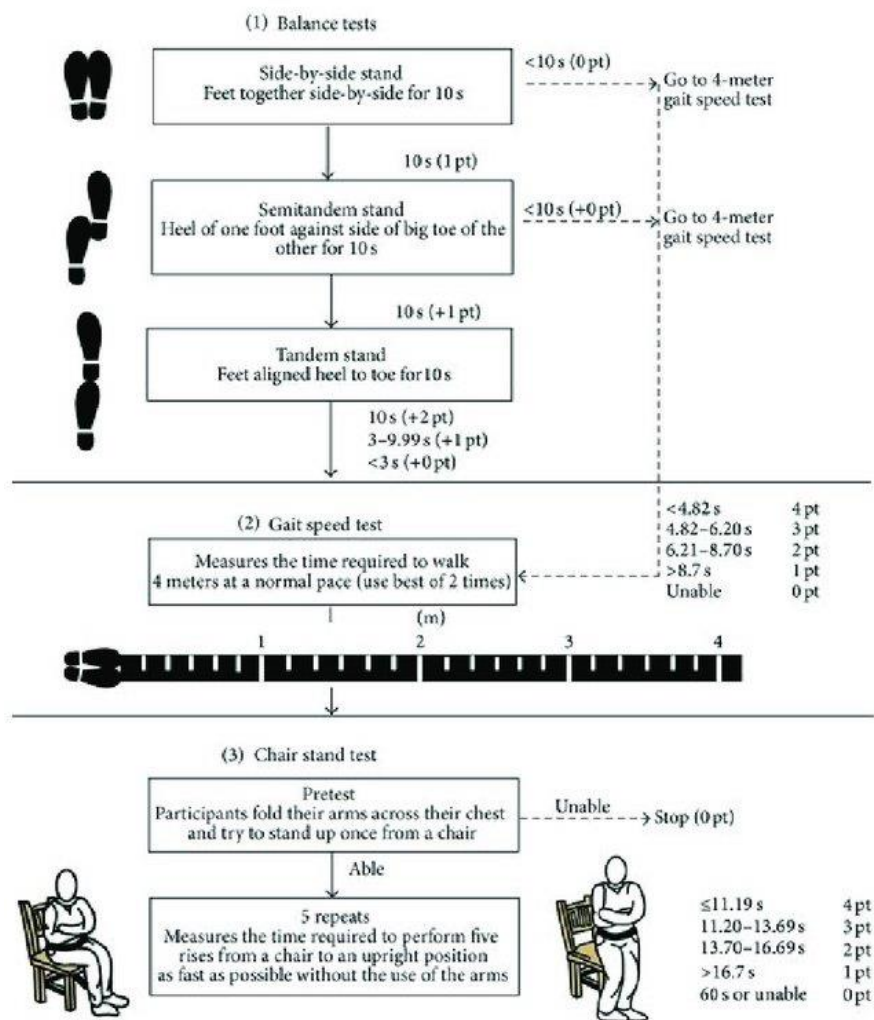

Mugueta-Aguinaga, I.; Garcia-Zapirain, B. FRED: Exergame to Prevent Dependence and Functional Deterioration Associated with Ageing. A Pilot Three-Week Randomized Controlled Clinical Trial. *Int. J. Environ. Res. Public. Health* 2017, 14, E1439, doi:10.3390/ijerph14121439.

Figure S2. FRAIL scale

| The FRAIL Scale |                                                                                      |
|-----------------|--------------------------------------------------------------------------------------|
| Item            | Scale                                                                                |
| Fatigue         | Tired all or most of the time during the past four weeks (No/Yes)                    |
| Resistance      | Difficulty walking up 10 steps without resting or aids (No/Yes)                      |
| Ambulation      | Difficulty walking several hundred yards alone without aid (500-600 meters) (No/Yes) |
| Illnesses       | 5 or more illnesses (No/Yes)                                                         |
| Loss of weight  | Weight loss >5% within the past moth (No/Yes)                                        |

**Frail Scale scores range from 0-5, one point for each component, 0=best to 5=worst**  
Robust = 0 points  
Pre-Frail = 0-1 points  
Frail = 3-5 points

Woo, J.; Yang, X.; Tin Lui, L.; Li, Q.; Fai Cheng, K.; Fan, Y.; Yau, F.; Lee, A.P.W.; Lee, J.S.W.; Fung, E. Utility of the FRAIL Questionnaire in Detecting Heart Failure with Preserved Ejection Fraction. J Nutr Health Aging 2019, 23, 373-377, doi:10.1007/s12603-019-1158-1.

Figure S3. ROC-curve showing the diagnostic performance of the SPPB scale to detect frailty defined as FRAIL score  $> 3$  in the younger group of patients

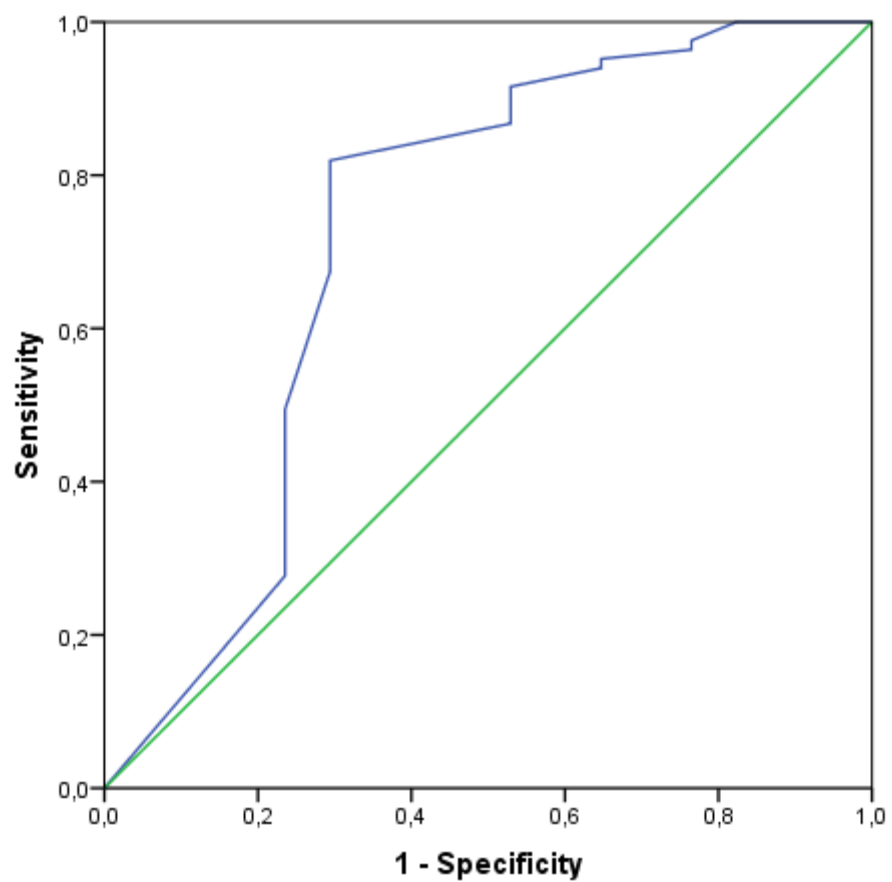

Table S1. HF treatment before admission

| <b>Medication</b>                                                         | <b>N</b> | <b>%</b> |
|---------------------------------------------------------------------------|----------|----------|
| Angiotensin-converting-enzyme inhibitors or Angiotensin receptor blockers | 84       | 41.6     |
| Sacubitril-valsartan                                                      | 23       | 11.4     |
| Aldosterone antagonists                                                   | 27       | 13.4     |
| Betablockers                                                              | 101      | 50.0     |
| Sodium glucose co-transporter 2 inhibitors                                | 19       | 9.4      |
| Diuretics                                                                 | 110      | 54.4     |
